# Supplementary material
Source: publisher figshare collection journal article supplement (https://acs.figshare.com/ndownloader/files/4191526)
Supplement: Supplementary file 1 [file 4191526]

# Phosphorescence imaging of living cells with amino acid-functionalized tris(phenylpyridine)iridium(III) complexes.

Peter Steunenberg,<sup>a</sup> Albert Ruggi,<sup>a</sup> Nynke S. van den Berg,<sup>b</sup> Tessa Buckle,<sup>b</sup> Joeri Kuil,<sup>b</sup> Fijs W.B. van Leeuwen<sup>b</sup> and Aldrik H. Velders<sup>a,c\*</sup>

<sup>a</sup>Supramolecular Chemistry and Technology, MESA+ Institute for Nanotechnology, University of Twente. PO Box 217, 7500 AE, Enschede The Netherlands. E-mail: a.h.velders@utwente.nl ;Fax +(31) 53489-4645

<sup>b</sup>Division of Diagnostic Oncology, The Netherlands Cancer Institute, Plesmanlaan 121, 1066 CX, Amsterdam, The Netherlands

<sup>c</sup>BioMedicalChemistry, MIRA Institute of Biomedical Technology and Technical Medicine, University of Twente. P.O. Box 217, 7500 AE, Enschede, The Netherlands.

E-mail: a.h.velders@utwente.nl

| Table of Contents.                                           | page |
|--------------------------------------------------------------|------|
| COSY spectrum of <i>fac</i> -(ppy) <sub>3</sub> Ir (3)       | 2    |
| HMQC spectrum of <i>fac</i> -(ppy) <sub>3</sub> Ir (3)       | 2    |
| HMBC spectrum of <i>fac</i> -(ppy) <sub>3</sub> Ir (3)       | 3    |
| COSY spectrum of <i>fac</i> -(ppy) <sub>2</sub> (cppy)Ir (4) | 3    |
| HMQC spectrum of <i>fac</i> -(ppy) <sub>2</sub> (cppy)Ir (4) | 4    |
| HMBC spectrum of <i>fac</i> -(ppy) <sub>2</sub> (cppy)Ir (4) | 4    |
| COSY spectrum of <i>fac</i> -(ppy)(cppy) <sub>2</sub> Ir (5) | 5    |
| HMQC spectrum of <i>fac</i> -(ppy)(cppy) <sub>2</sub> Ir (5) | 5    |
| HMBC spectrum of <i>fac</i> -(ppy)(cppy) <sub>2</sub> Ir (5) | 6    |
| COSY spectrum of <i>fac</i> -(cppy) <sub>3</sub> Ir (7)      | 6    |
| HMQC spectrum of <i>fac</i> -(cppy) <sub>3</sub> Ir (7)      | 7    |
| HMBC spectrum of <i>fac</i> -(cppy) <sub>3</sub> Ir (7)      | 7    |
| Confocal images                                              | 8    |

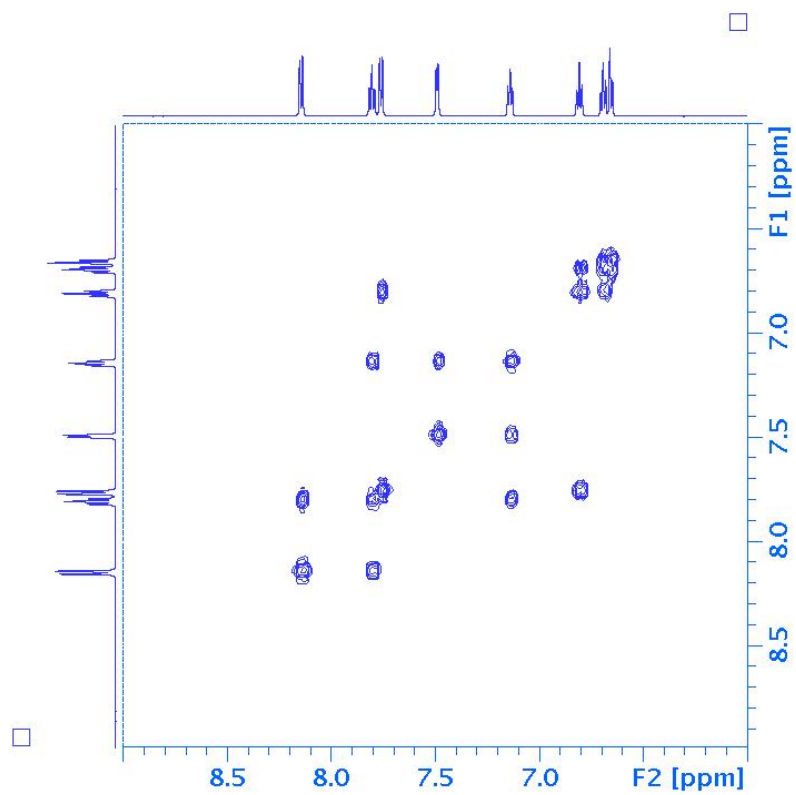

Figure S1. COSY spectrum (600 MHz) of **3** in DMSO.

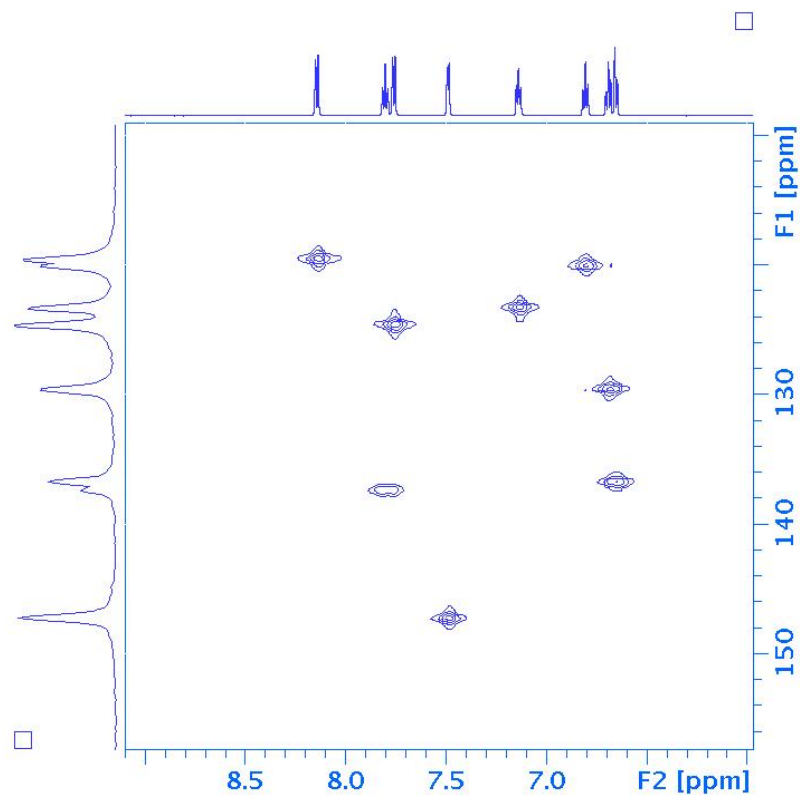

Figure S2. HMQC spectrum (600 MHz) of **3** in DMSO.

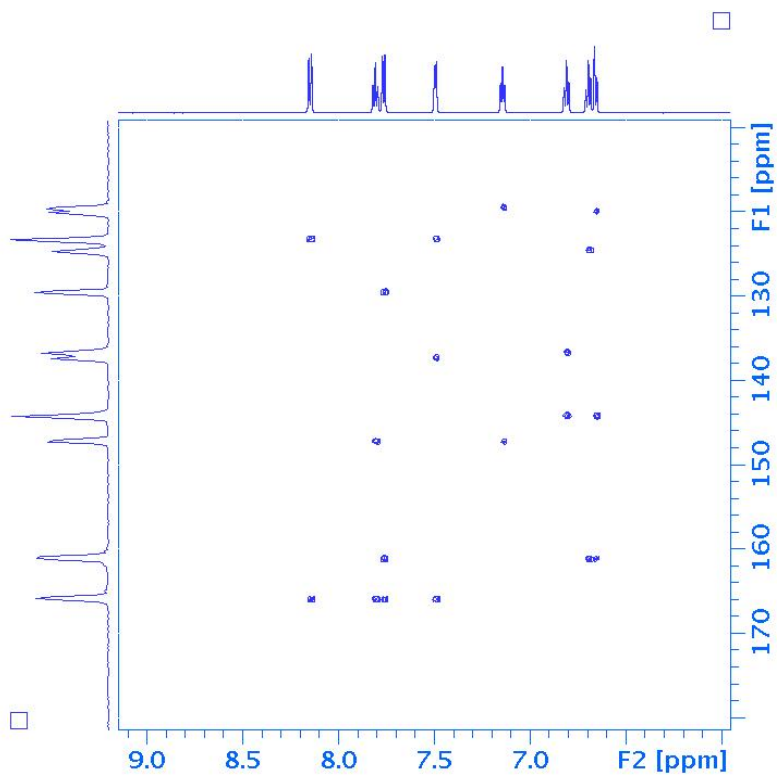

Figure S3. HMBC spectrum (600/150 MHz) of **3** in DMSO

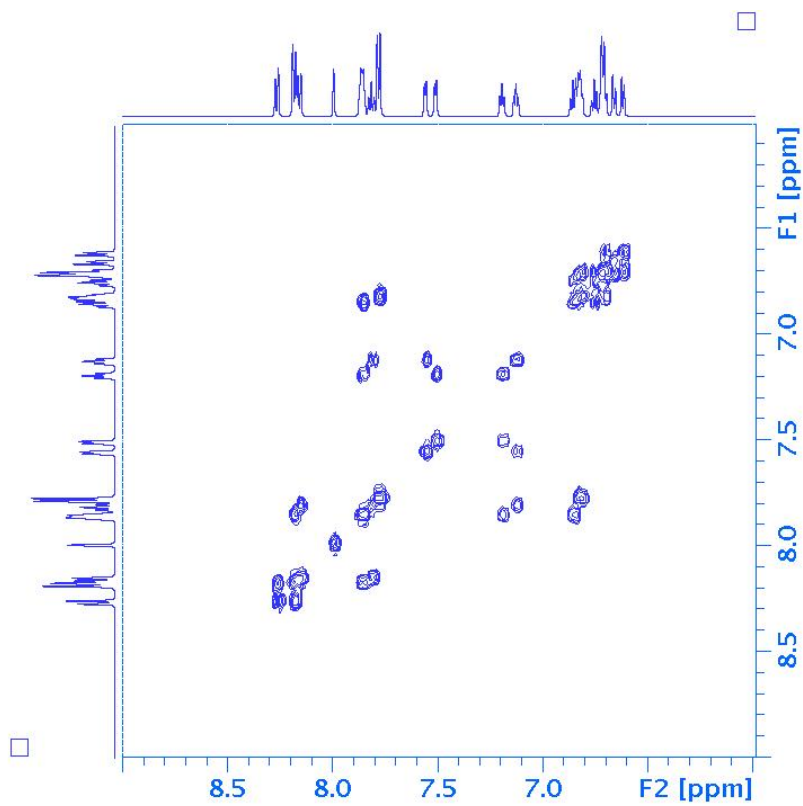

Figure S4. COSY spectrum (600/150 MHz) of **4** in DMSO.

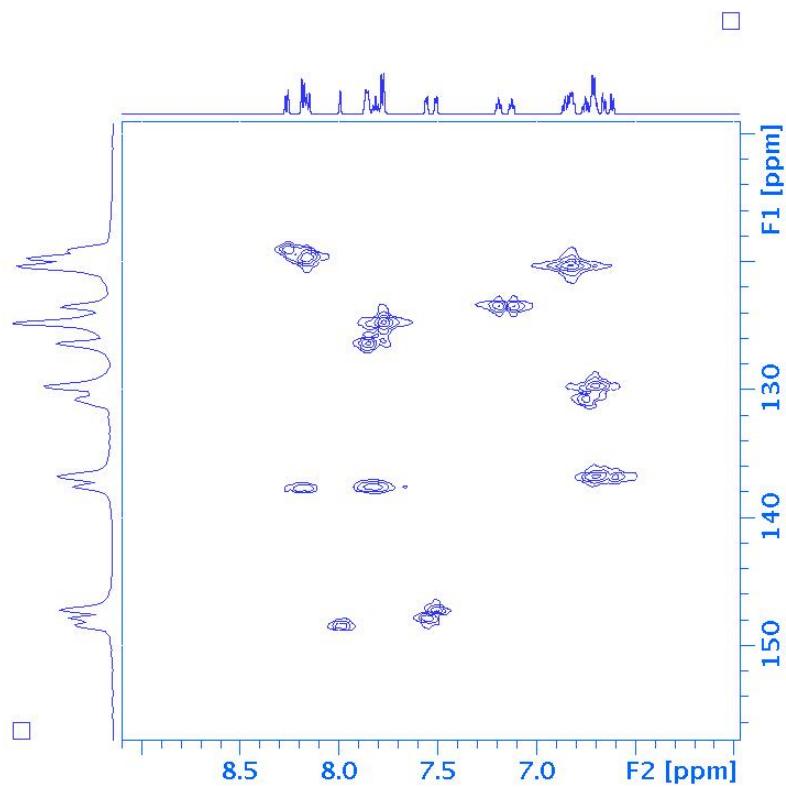

Figure S5. HMQC spectrum (600/150 MHz) of **4** in DMSO.

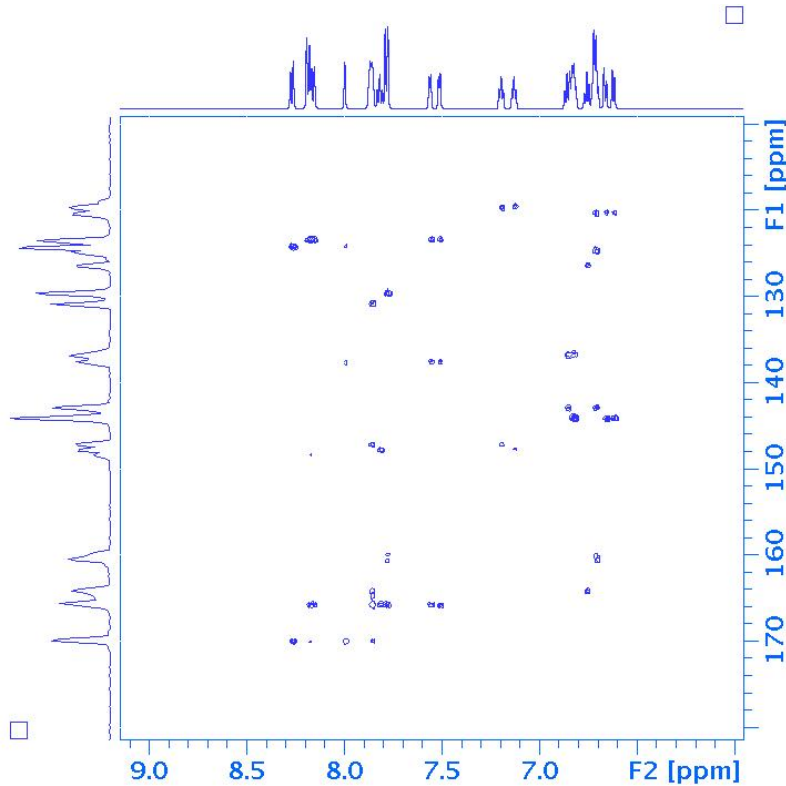

Figure S6. HMBC spectrum (600/150 MHz) of **4** in DMSO

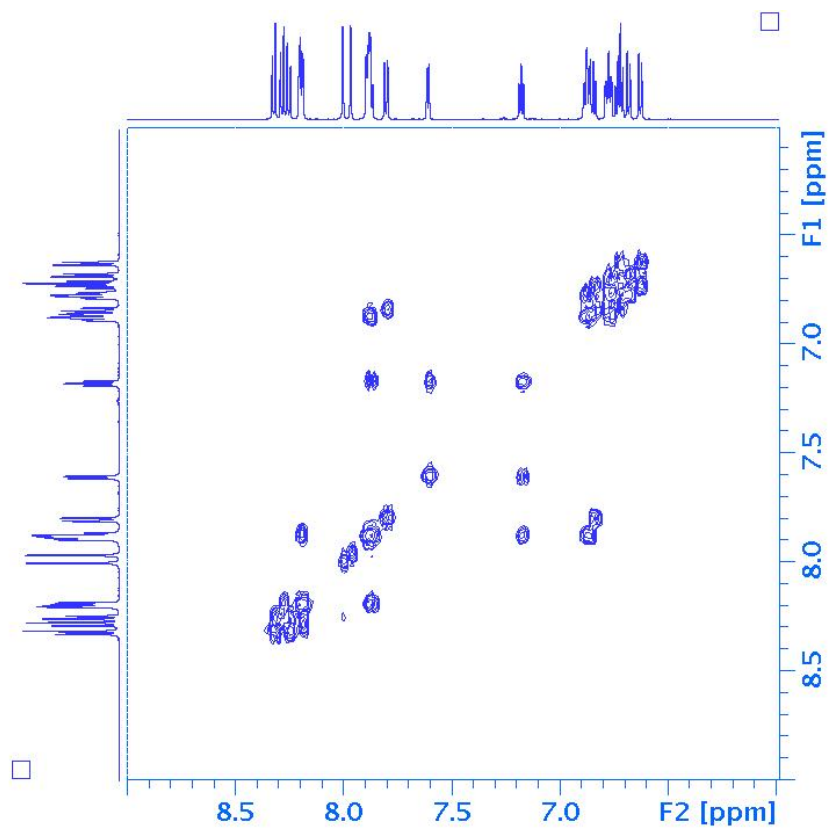

Figure S7. COSY spectrum (600 MHz) of **5** in DMSO.

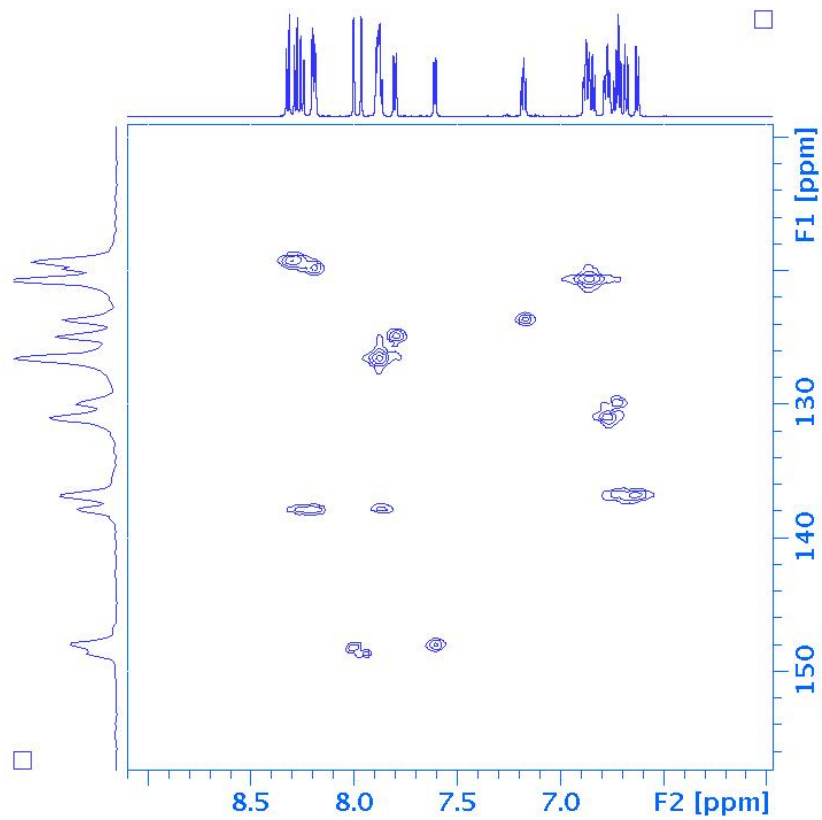

Figure S8. HMQC spectrum (600/150 MHz) of **5** in DMSO

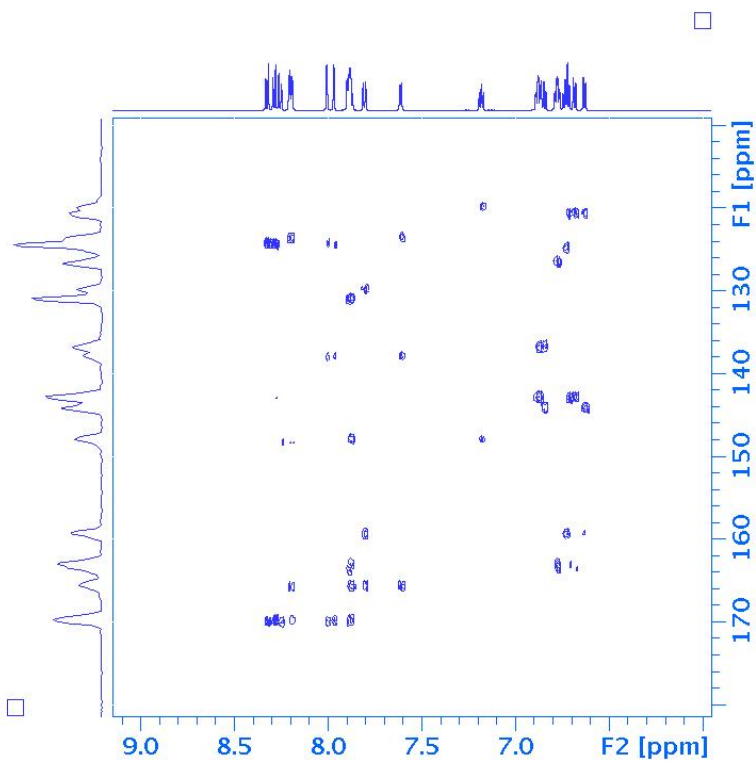

Figure S9. HMBC spectrum (600/150 MHz) of **5** in DMSO.

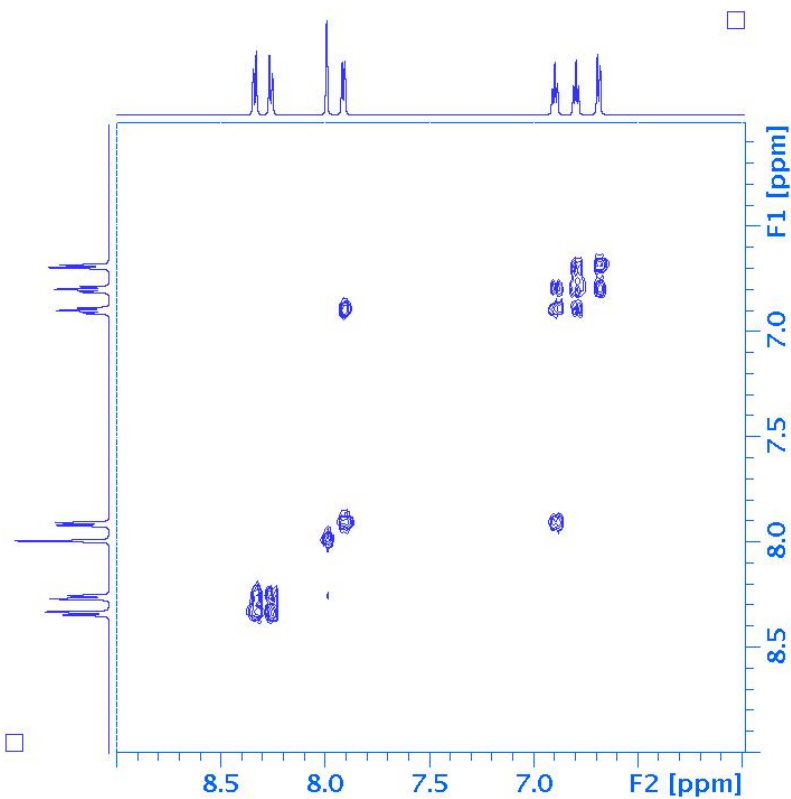

Figure S10. COSY spectrum (600 MHz) of **7** in DMSO.

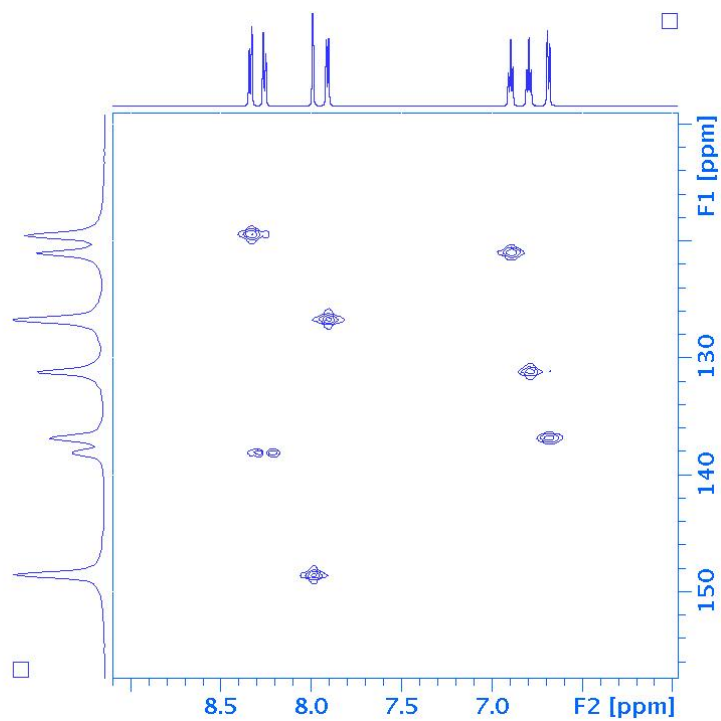

Figure S11. HMQC spectrum (600/150 MHz) of **7** in DMSO.

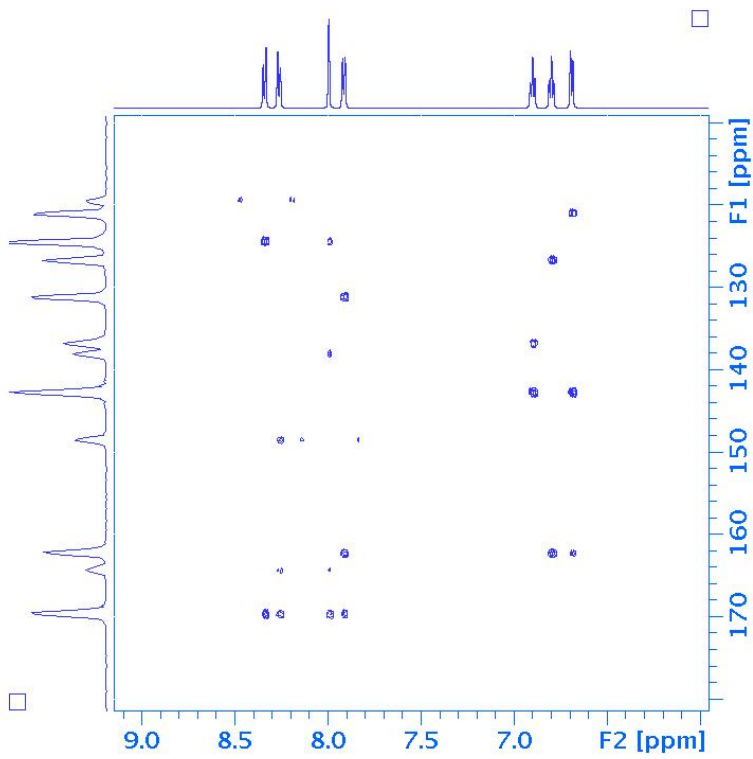

Figure S12. HMBC spectrum (600/150 MHz) of **7** in DMSO.

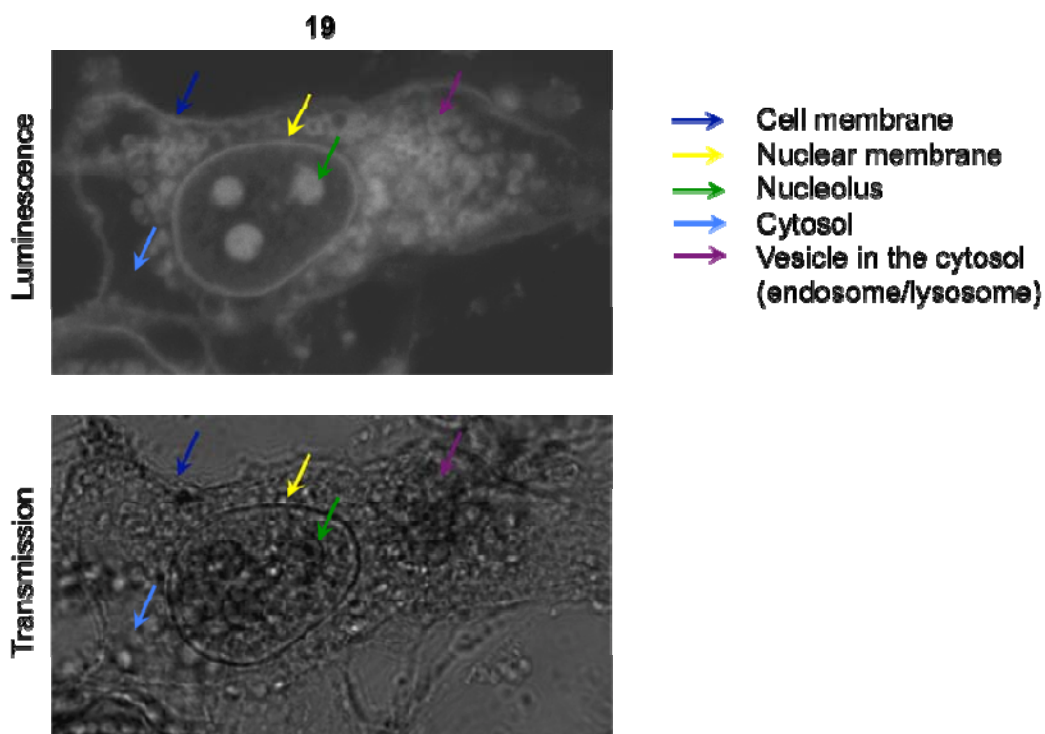

Figure S13. Confocal microscopy image of the cellular distribution of the lysine substituted iridium(III) complex **19**. As shown in the luminescence image, complex **19** was detected in the cytosol (light blue arrow) in vesicles (purple arrow) (endosomes or lysosome). Moreover, accumulation occurred in the nucleoli of the cell nucleus (green arrow). Luminescence is shown in grey scale to provide the best contrast; therefore the transmission image is added separately. A higher concentration DMSO was used as compared to the other experiments.
